# Supplementary material
Source: Springer Nature journal article supplement (https://www.springermedizin.de/resource/supplementary/12889_2008_1672_MOESM1_ESM.pdf/9503698)
Supplement: MOESM1 [file 9503698]

| Child factor                          | Category          | Number | Proportion with IgG antibody (n) | Unweighted Odd Ratio, (95%CI) | Weighted Odd Ratios (95%CI) | <i>p</i> -value |
|---------------------------------------|-------------------|--------|----------------------------------|-------------------------------|-----------------------------|-----------------|
| Age(yrs)                              | <7                | 41     | 58.5(24)                         | 1.00                          |                             |                 |
|                                       | 7-12              | 207    | 84.5(175)                        | 3.79<br>(1.79-8.01)           | 3.85<br>(2.56-5.78)         | 0.000           |
|                                       | >13               | 177    | 93.8(166)                        | 7.86<br>(3.68-16.78)          | 8.18<br>(4.42-15.13)        | 0.000           |
| Number of siblings                    | less than three   | 97     | 78.4(76)                         | 1.00                          |                             |                 |
|                                       | >3                | 379    | 88.1(334)                        | 1.20<br>(1.07-1.35)           | 2.16<br>(1.04-4.48)         | 0.042           |
| Birth position                        | First born        | 105    | 83.8(88)                         | 1.00                          |                             |                 |
|                                       | Other             | 370    | 86.8(321)                        | 1.04<br>(0.93-1.16)           | 1.21<br>(0.70-2.09)         | 0.424           |
| Sex                                   | Female            | 240    | 85.4(205)                        | 1.00                          |                             |                 |
|                                       | Male              | 236    | 86.9(205)                        | 1.13<br>(0.67-1.90)           | 1.20<br>(0.61-2.34)         | 0.534           |
| History of traveling outside district | Yes               | 100    | 83.0(83)                         | 1.00                          |                             |                 |
|                                       | No                | 377    | 329(87.3)                        | 1.40<br>(0.77-2.57)           | 1.54<br>(0.53-4.47)         | 0.363           |
| Area of travel                        | No travel history | 384    | 84.8(323)                        | 1.00                          |                             |                 |
|                                       | Rural             | 62     | 79.0(49)                         | 0.57<br>(0.29-1.13)           | 0.50<br>(0.14-1.78)         | 0.23            |
|                                       | Urban             | 37     | 89.2(37)                         | 1.25<br>(0.42-3.69)           | 1.3<br>(0.13-12.95)         | 0.79            |
| Involved in extra-curriculum activity | Games             | 215    | 83.3(179)                        | 1.00                          |                             |                 |
|                                       | Singing           | 31     | 96.8(30)                         | 6.03<br>(0.80-45.67)          | 5.70<br>(1.25-26.00)        | 0.03            |
|                                       | Other             | 221    | 86.9(192)                        | 1.33<br>(0.78-2.26)           | 1.37<br>(0.83-2.28)         | 0.175           |
| History of rash illness               | Yes               | 41     | 85.4(35)                         | 1.00                          |                             |                 |
|                                       | No                | 432    | 86.1(372)                        | 1.06<br>(0.43-2.64)           | 1.02<br>(0.64-1.62)         | 0.937           |

| Socio-economic factors     | Category       | Number(N) | Proportion with IgG antibody (n) | Unweighted OR, (95%CI) | Weighted OR (95%CI)  | p-value  |
|----------------------------|----------------|-----------|----------------------------------|------------------------|----------------------|----------|
| Mothers level of education | None           | 40        | 87.5(35)                         | 1.00                   | 1.00                 |          |
|                            | Primary        | 227       | 86.7(234)                        | 0.84<br>(0.28-2.51)    | 0.93<br>(0.18-4.96)  | 0.923    |
|                            | Secondary      | 104       | 78.8(82)                         | 0.49(0.16-1.56)        | 0.51<br>(0.10-2.53)  | 0.343    |
|                            | Tertiary       | 5         | 60.0(3)                          | 0.17<br>(0.02-1.35)    | 0.16<br>(0.01-2.99)  | 0.176    |
| Fathers level of education | None           | 39        | 89.7(35)                         | 1.000                  |                      |          |
|                            | Primary        | 213       | 87.3(185)                        | 0.42<br>(0.10-1.87)    | 0.52<br>(0.02-10.08) | 0.609    |
|                            | Secondary      | 112       | 79.3(88)                         | 0.26<br>(0.06-1.20)    | 0.32<br>(0.02-6.21)  | 0.387    |
|                            | Tertiary       | 16        | 75(12)                           | 0.17<br>(0.03-1.06)    | 0.21<br>(0.00-9.81)  | 0.361    |
| Mothers occupation         | Housewife      | 314       | 85.4(268)                        | 1.000                  |                      |          |
|                            | Civil servant  | 9         | 66.7(6)                          | 0.34<br>(0.08-1.42)    | 0.36<br>(0.10-1.33)  | 0.105(F) |
|                            | Peasant farmer | 52        | 88.5(46)                         | 2.63<br>(0.79-8.82)    | 2.66<br>(0.54-13.09) | 0.184    |
|                            | Other          | 26        | 80.8(21)                         | 0.90<br>(0.30-2.74)    | 0.91<br>(0.17-4.76)  | 0.894    |
| Fathers occupation         | Civil servant  | 36        | 83.3(30)                         | 1.00                   |                      | -        |
|                            | Peasant farmer | 161       | 87.6(141)                        | 1.18<br>(0.41-3.38)    | 1.26<br>(0.22-7.12)  | 0.751    |
|                            | Farmers        | 30        | 73.3(22)                         | 0.46<br>(0.13-1.59)    | 0.46<br>(0.12-1.72)  | 0.198    |
|                            | Other          | 130       | 86.9(113)                        | 1.11<br>(0.38-3.25)    | 1.19<br>(0.22-6.31)  | 0.809    |

| Socio-economic factors                    | Category       | Number (N) | Proportion with IgG antibody (n) | Unweighted OR, (95%CI) | Weighted OR (95%CI) | p-value |
|-------------------------------------------|----------------|------------|----------------------------------|------------------------|---------------------|---------|
| Type of housing                           | Permanent      | 43         | 86(37)                           | 1.00                   |                     |         |
|                                           | Semi-permanent | 323        | 85.8(277)                        | 0.98(0.39-2.44)        | 1.08(0.36-3.22)     | 0.871   |
|                                           | Temporary      | 108        | 88(95)                           | 1.19(0.42-3.35)        | 1.31(0.30-5.79)     | 0.673   |
| Family owned Television set               | Yes            | 55         | 70.9(39)                         | 1.00                   |                     |         |
|                                           | No             | 420        | 88.1(370)                        | 3.04 (1.58-5.83)       | 3.06 (1.17-7.97)    | 0.029   |
| Family owned car/tractor                  | Yes            | 24         | 83.3(20)                         | 1.00                   |                     |         |
|                                           | No             | 445        | 86.5(445)                        | 1.42 (0.30-6.74)       | 1.46 (0.48-4.48)    | 0.439   |
| Ownership of a bicycle                    | Yes            | 282        | 85.5(241)                        | 1.00                   |                     |         |
|                                           | No             | 195        | 87.2(170)                        | 1.16 (0.68-1.97)       | 1.11 (0.52-2.41)    | 0.741   |
| Non-family adults staying in              | Yes            | 292        | 85.6(250)                        | 1.00                   | 1.00                |         |
|                                           | No             | 176        | 87.5(154)                        | 1.18 (0.68-2.04)       | 1.14 (0.63-2.32)    | 0.670   |
| Non-family members staying in and working | Yes            | 89         | 78.4(69)                         | 1.00                   | 1.00                |         |
|                                           | No             | 193        | 84.4(162)                        | 2.01 (1.01-4.01)       | 2.08 (0.90-4.80)    | 0.076   |

| Socio-economic factors | Category | Number(N) | Proportion with IgG antibody (n) | Unweighted OR, (95%CI) | Weighted OR (95%CI) | p-value |
|------------------------|----------|-----------|----------------------------------|------------------------|---------------------|---------|
|------------------------|----------|-----------|----------------------------------|------------------------|---------------------|---------|

|                                       |               |     |           |                     |                     |       |
|---------------------------------------|---------------|-----|-----------|---------------------|---------------------|-------|
| Type cooking fuel                     | Other         | 15  | 93.3(14)  | 1.00                |                     |       |
|                                       | Firewood      | 478 | 83.6(397) | 0.44<br>(0.06-3.37) | 0.39<br>(0.08-1.89) | 0.196 |
| Number of living rooms                | Two           | 105 | 86.7(91)  | 1.000               |                     |       |
|                                       | More than two | 371 | 86.0(319) | 0.94<br>(0.50-1.77) | 0.86<br>(0.28-2.66) | 0.281 |
| Number of households within homestead | Zero          | 94  | 87.2(82)  | 1.000               |                     |       |
|                                       | One or more   | 374 | 85.8(231) | 0.89<br>(0.45-1.74) | 0.86<br>(0.28-2.66) | 0.761 |
| Persons sharing room with child       | No            | 24  | 95.8(23)  | 1.000               |                     |       |
|                                       | Yes           | 451 | 85.6(386) | 0.26<br>(0.03-1.94) | 0.24<br>(0.02-3.24) | 0.228 |
